# Supplementary material for: CLUSTOM-CLOUD: In-Memory Data Grid-Based Software for Clustering 16S rRNA Sequence Data in the Cloud Environment
Source: PLOS journal article supplement (doi:10.1371/journal.pone.0151064), 2016-03-08
Supplement: S3 (10.1371/journal.pone.0151064.s003) [file journal.pone.0151064.s003]

```

<?xml version="1.0" encoding="UTF-8"?>
<!DOCTYPE properties SYSTEM "http://java.sun.com/dtd/properties.dtd">
<properties>
    <comment>CLUSTOM PROPERTIES</comment>
    <entry key="imdg_server">127.0.0.1:5701</entry>
    <entry key="imdg_ip_range">127.0.0.*</entry>
    <entry key="imdg_ip_member">127.0.0.1</entry>
    <entry key="imdg_port_number">5701</entry>
    <entry key="the_number_of_threads">8</entry>
    <entry key="chunk-size">2000</entry>
    <entry key="aws-enabled">>false</entry>
    <entry key="access-key"></entry>
    <entry key="secret-key"></entry>
    <entry key="region"></entry>
    <entry key="host-header"></entry>
</properties>

```

| Property              | Description                                                          |
|-----------------------|----------------------------------------------------------------------|
| imdg_server           | A compulsory node IP of IMDG server.                                 |
| imdg_ip_range         | An interface IP range to IMDG server.                                |
| imdg_ip_member        | All IMDG members IP.                                                 |
| imdg_port_number      | A port number of each IMDG node.                                     |
| the_number_of_threads | The number of threads.                                               |
| chunk_size            | data size for allocating to each node (the number of sequence pairs) |

|                       |                                                                       |
|-----------------------|-----------------------------------------------------------------------|
| aws-enabled(optional) | Choose it true if you want to use the Amazon Web Service environment. |
| access-key(optional)  | An access key of your AWS.                                            |
| secret-key(optional)  | A secret key of your AWS.                                             |
| region(optional)      | The region name of your AWS.                                          |
| host-header(optional) | A host header of your AWS.                                            |
